# Supplementary material for: Two-dimensional high performance liquid chromatography purification of underivatized urinary prednisone and prednisolone for compound-specific stable carbon isotope analysis
Source: Royal Society of Chemistry journal article supplement (doi:10.1039/d4an00690a), 2024-01-01

## Supporting Information

### Two-dimensional high performance liquid chromatography purification of underivatized urinary prednisone and prednisolone for compound-specific stable carbon isotope analysis

Zhongquan Li<sup>a</sup> and Bing Liu<sup>\*a</sup>

<sup>a</sup>Research Institute for Doping Control, Shanghai University of Sport, 900 Jiangwancheng Road, Shanghai 200438, China

\*Corresponding author: liubing2019@sus.edu.cn

1. Table S1 Compounds in CUPCC

| Compounds | $\delta^{13}\text{C}$ (‰) |
|-----------|---------------------------|
| Etio      | -28.75±0.01               |
| A         | -26.74±0.03               |
| PD        | -18.65±0.03               |

2. Fig. S1 Schematics of the 2D-HPLC instrumentation without trap mode.

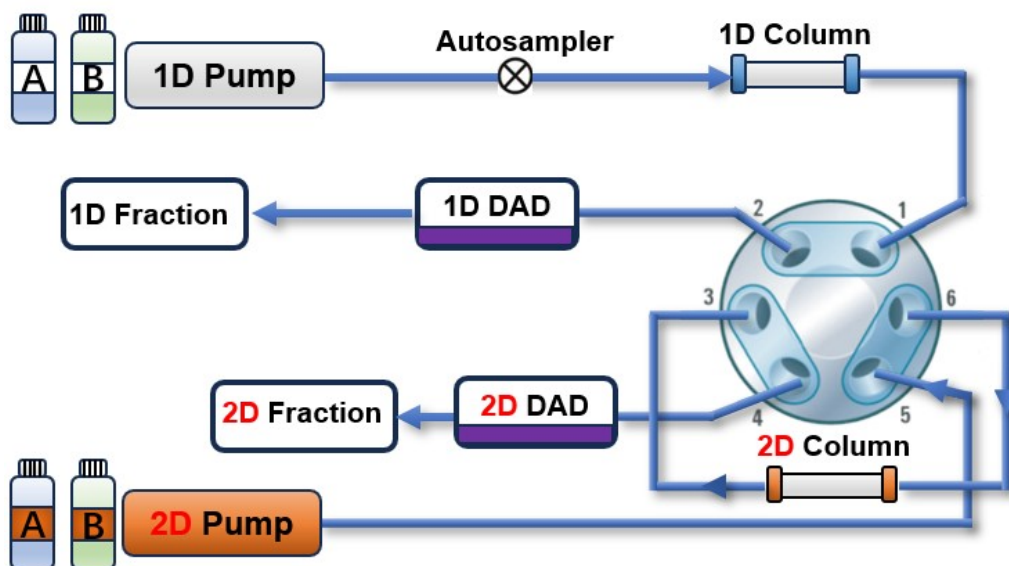

3. Fig. S2 Results of the 2D-HPLC instrumentation without trap mode. (A: 2D-HPLC Chromatograms for PS and PSL; B Pressure line of 2D-HPLC; C: GC chromatograms for PSL.)

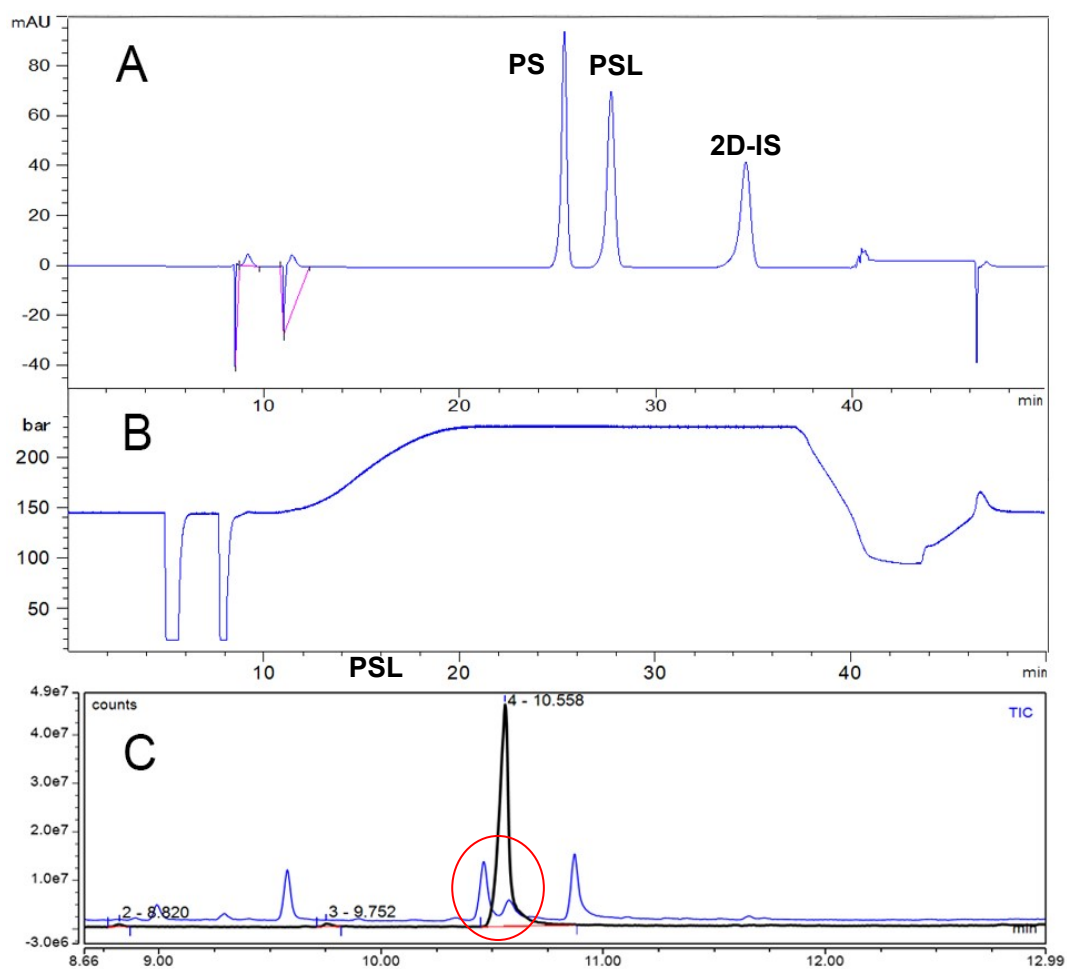

4. Table S2: The  $\delta^{13}\text{C}$  comparison between before and after purification for PS and PSL.

| Compound | Before-Purification ( $n=6$ )<br>$\delta^{13}\text{C}$ (‰) | Post-Purification ( $n=6$ )<br>$\delta^{13}\text{C}$ (‰) | Difference<br>(‰) |
|----------|------------------------------------------------------------|----------------------------------------------------------|-------------------|
| PS       | $-30.27 \pm 0.29$                                          | $-30.34 \pm 0.36$                                        | 0.07              |
| PSL      | $-30.41 \pm 0.30$                                          | $-30.62 \pm 0.25$                                        | 0.21              |

5. Fig. S3 HPLC overlap chromatograms after ten injections of standard solutions. (A: 1D-HPLC chromatograms of MT; B: 2D-HPLC chromatograms of Dex)

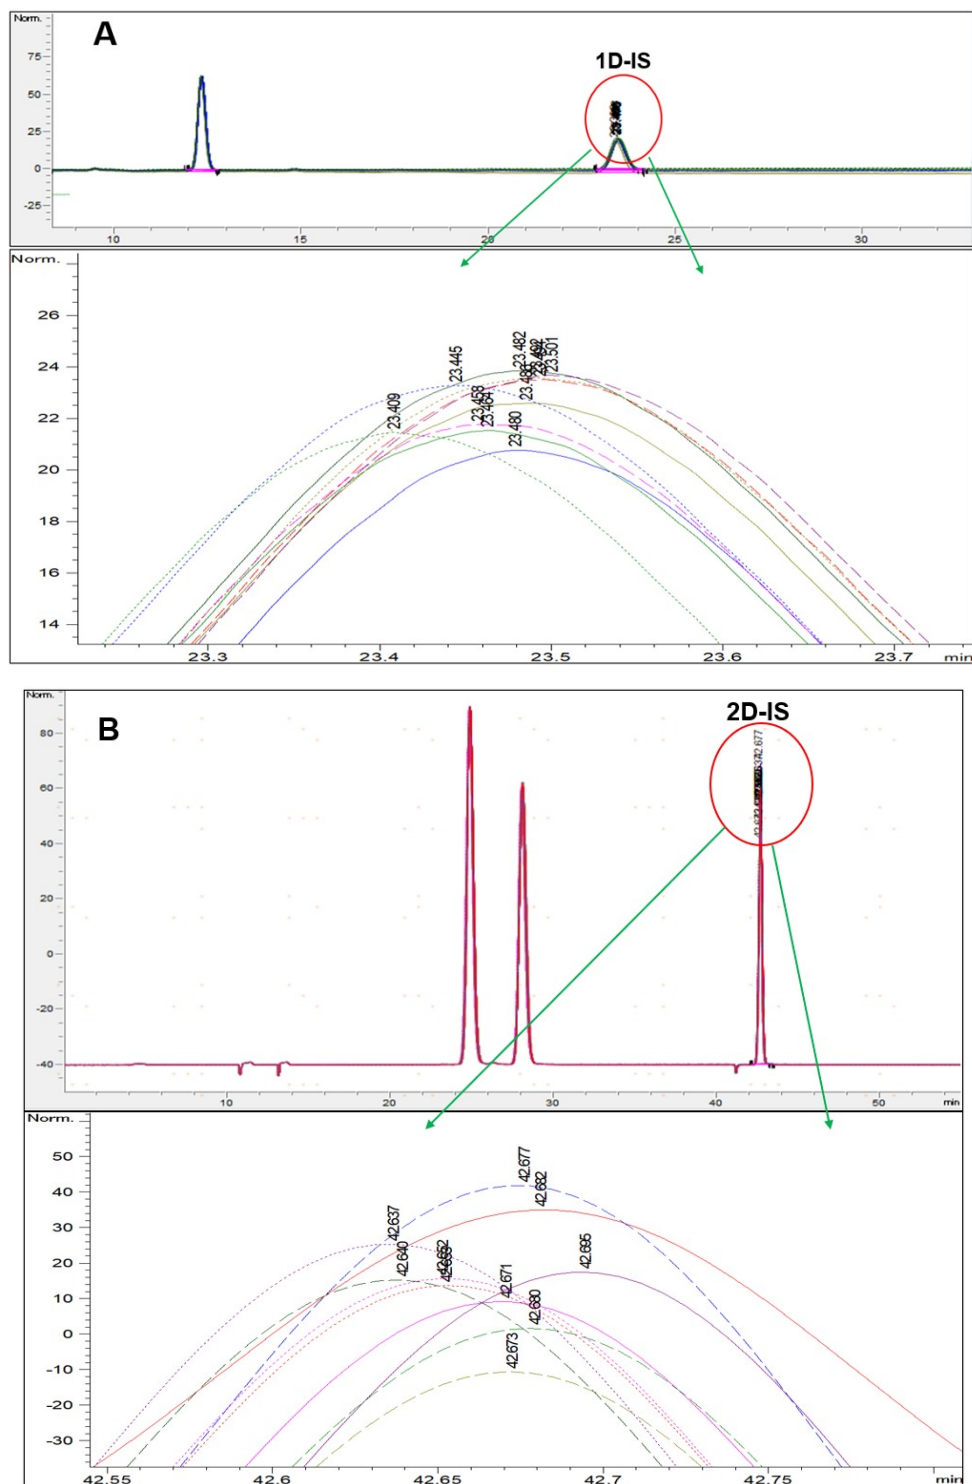

6. Fig. S4 HPLC chromatograms after ten injections of urine samples. (A: 1D-HPLC chromatograms; B: 2D-HPLC chromatograms)

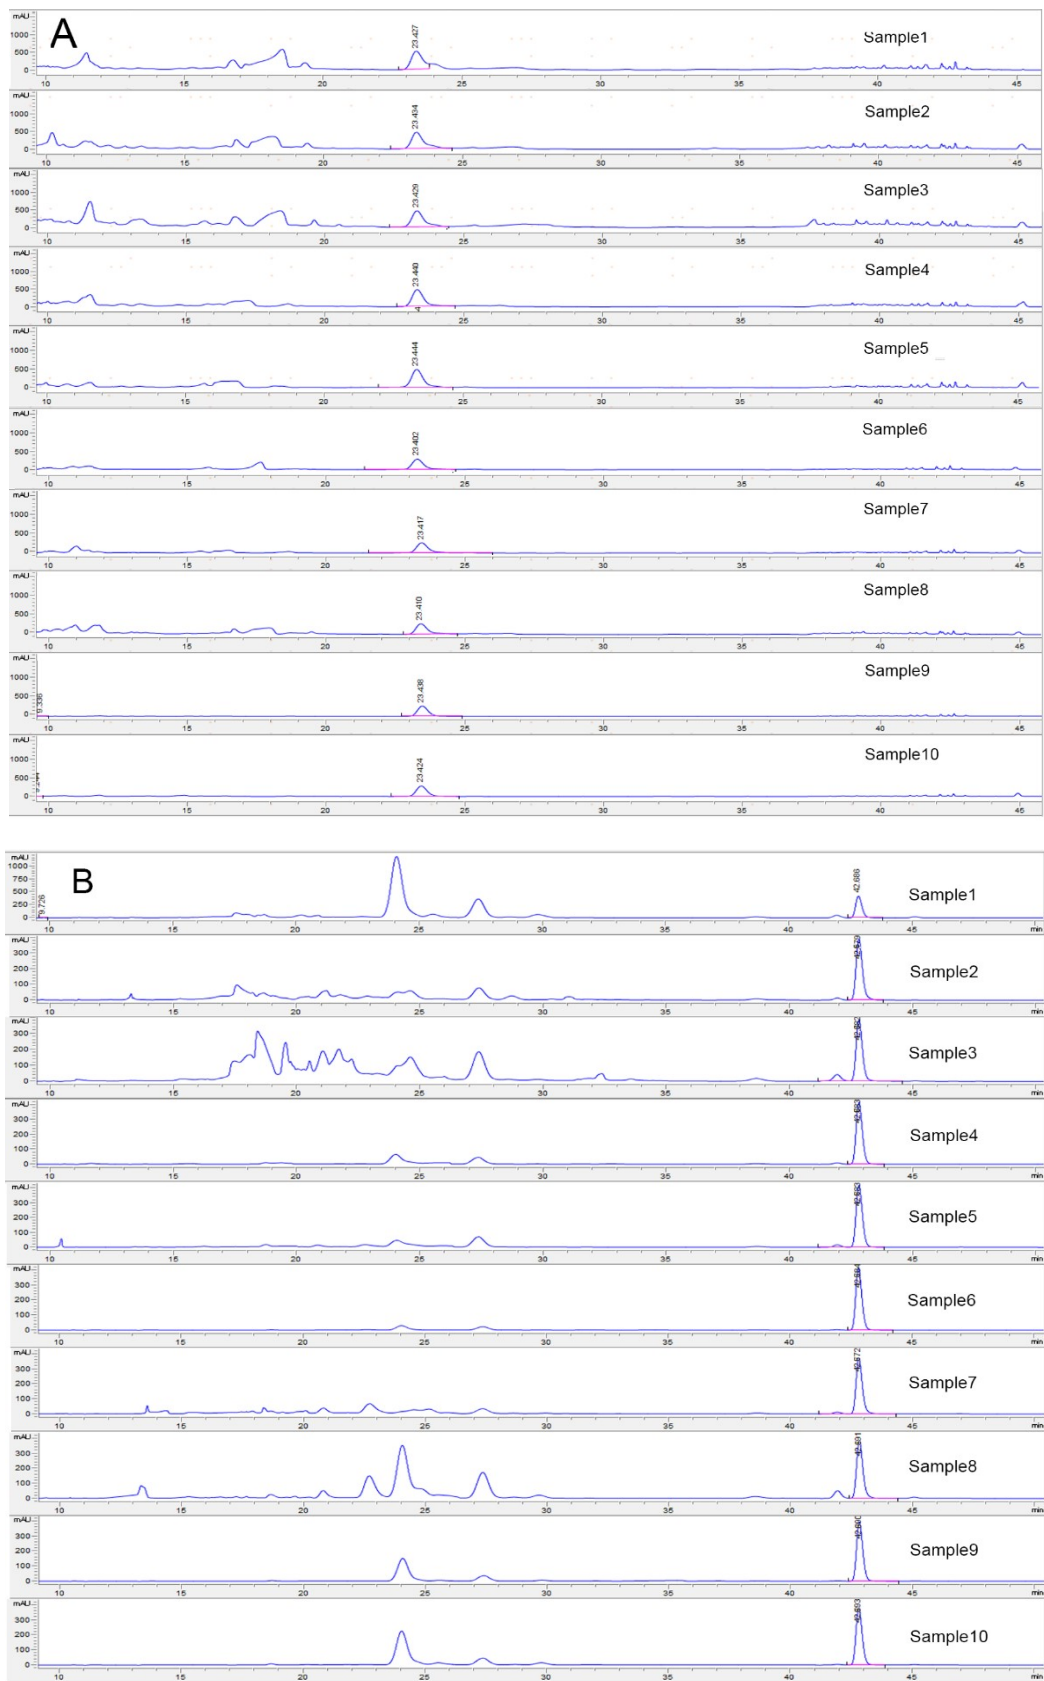

7. Fig. S5: Mass spectrum obtained from GC/MS. (A: Mass spectrum of PS; B: Mass spectrum of PSL)

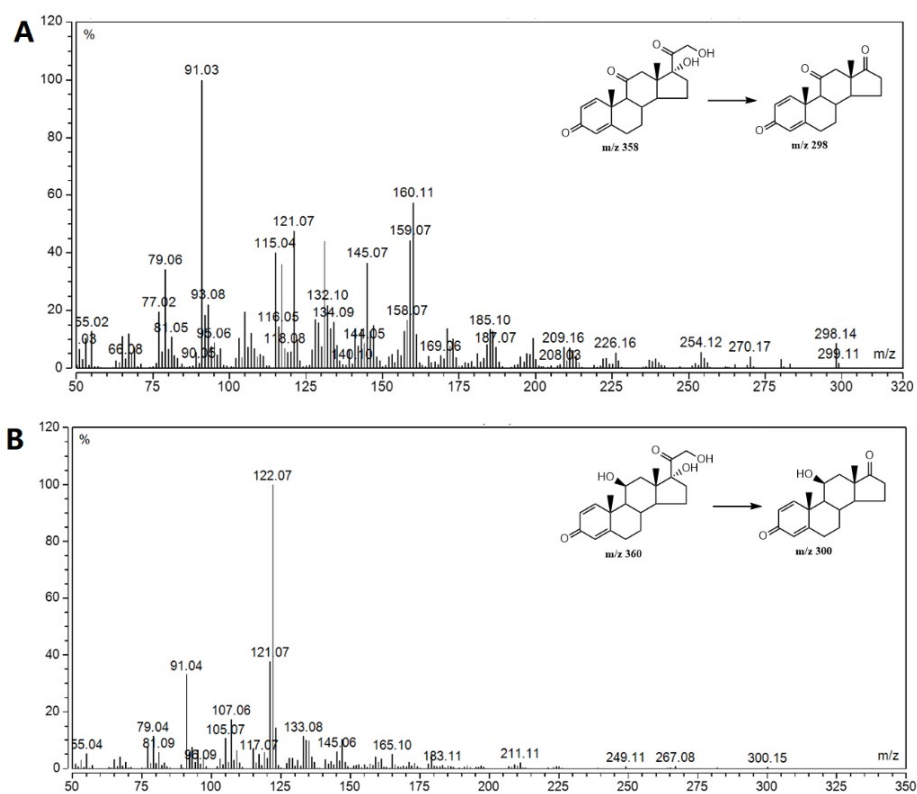

Supplement: d4an00690a1.pdf [file d4an00690a1.pdf]
